# Supplementary material for: Supercritical CO2 Processing of White Grape Must as a Strategy to Reduce the Addition of SO2
Source: MDPI journal article supplement (doi:10.3390/foods12163085), 2023-08-17
Supplement: s1 [file s1]

# SUPPLEMENTARY MATERIAL

| Trial          | P (bar) | %CO <sub>2</sub> | t (min) | Approximated color |
|----------------|---------|------------------|---------|--------------------|
| Untreated must |         |                  |         |                    |
| 1              | 100     | 10               | 10      |                    |
| 2              | 100     | 10               | 20      |                    |
| 3              | 100     | 40               | 10      |                    |
| 4              | 100     | 40               | 20      |                    |
| 5              | 100     | 70               | 10      |                    |
| 6              | 100     | 70               | 20      |                    |
| 7              | 250     | 10               | 10      |                    |
| 8              | 250     | 10               | 20      |                    |
| 9              | 250     | 40               | 10      |                    |
| 10             | 250     | 40               | 20      |                    |
| 11             | 250     | 70               | 10      |                    |
| 12             | 250     | 70               | 20      |                    |

**Figure S1.** Approximate color of untreated and treated musts given by the free software MSCV®.
